# Supplementary material for: Strength Characteristics of Dressed Stone Masonry
Source: Research Square preprint supplement (doi:10.21203/rs.3.rs-6267317/v1), 2025-03-24

# Supplementary Materials for Review:

I have managed all the medias related to laboratory tests and I also attached few medias in this word document. Remaining data will be sent if required during review.


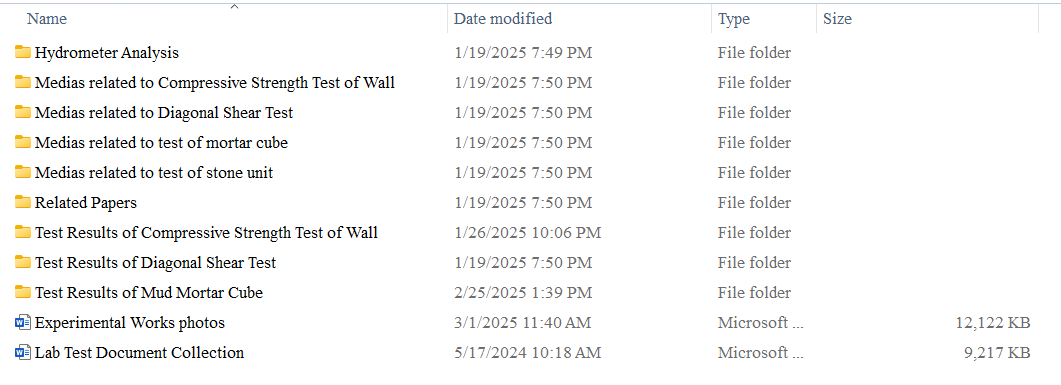


# Hydrometer Analysis:


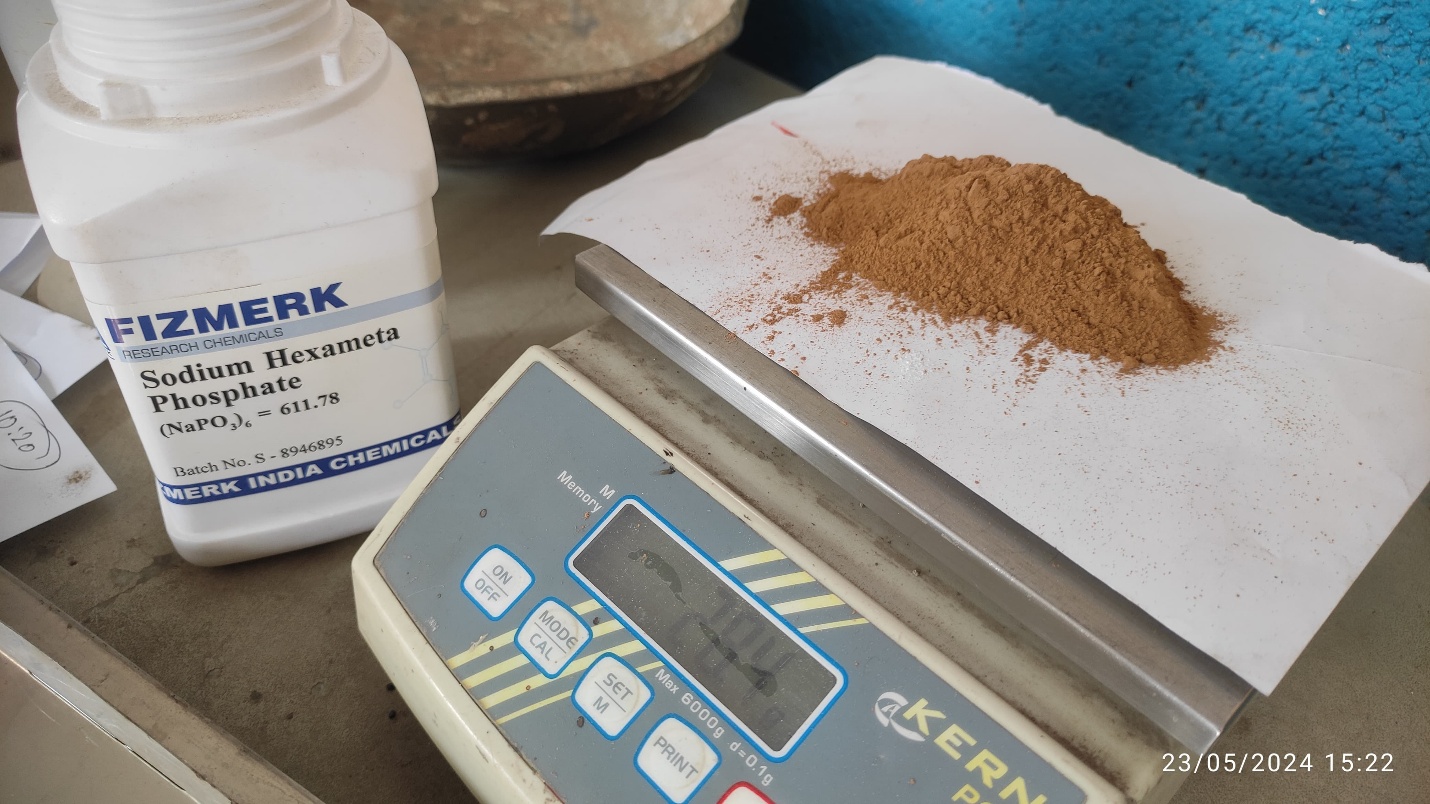

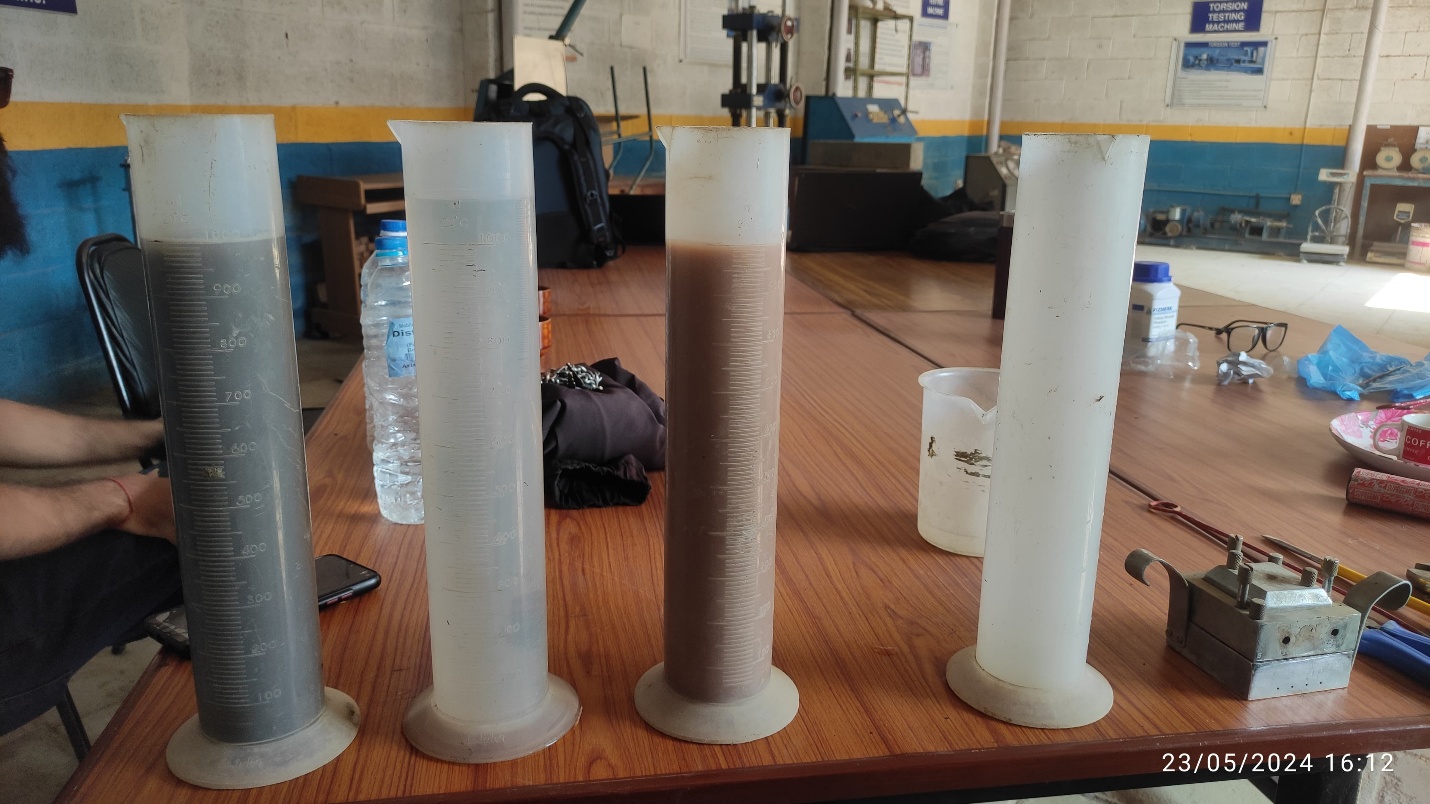


# Compressive/Flexural Strength test of Stone


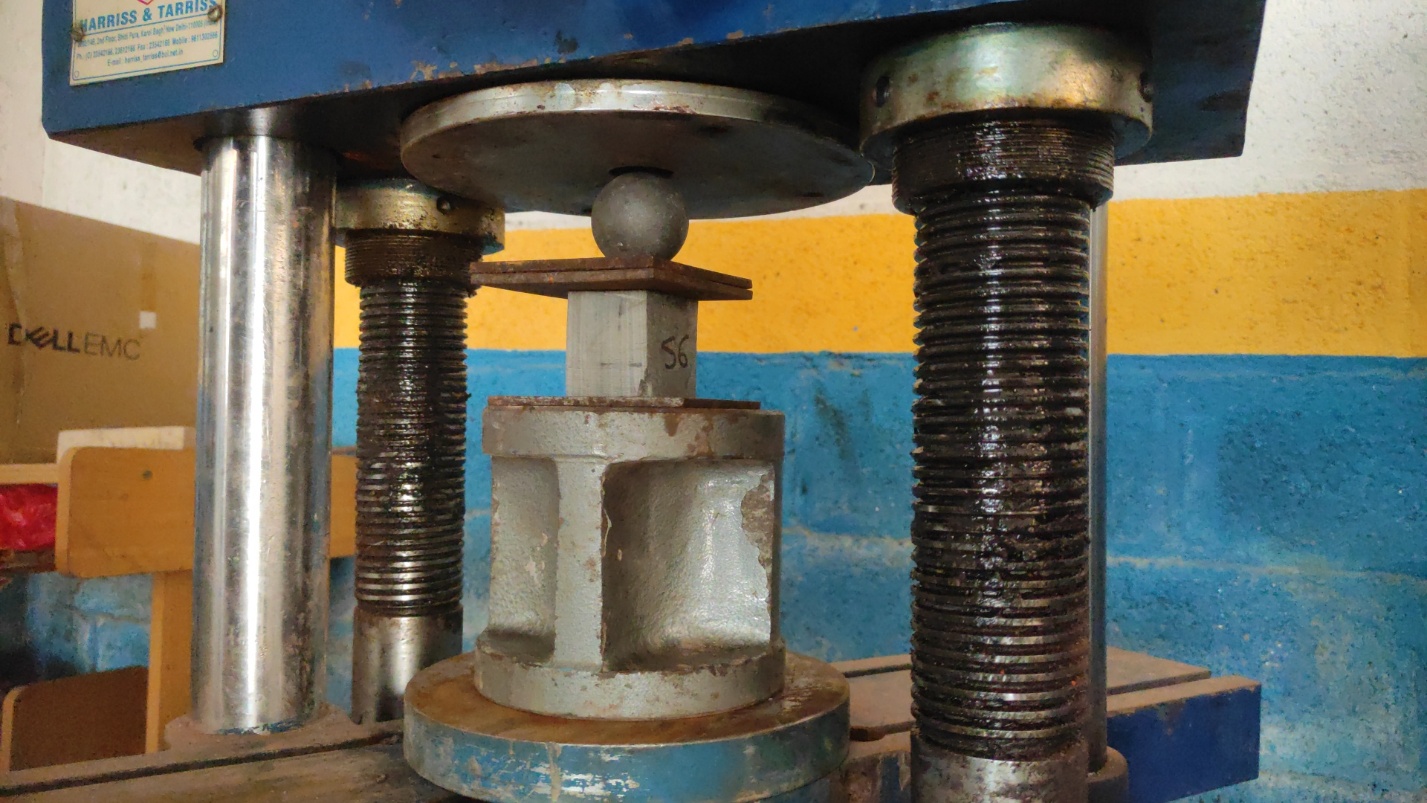


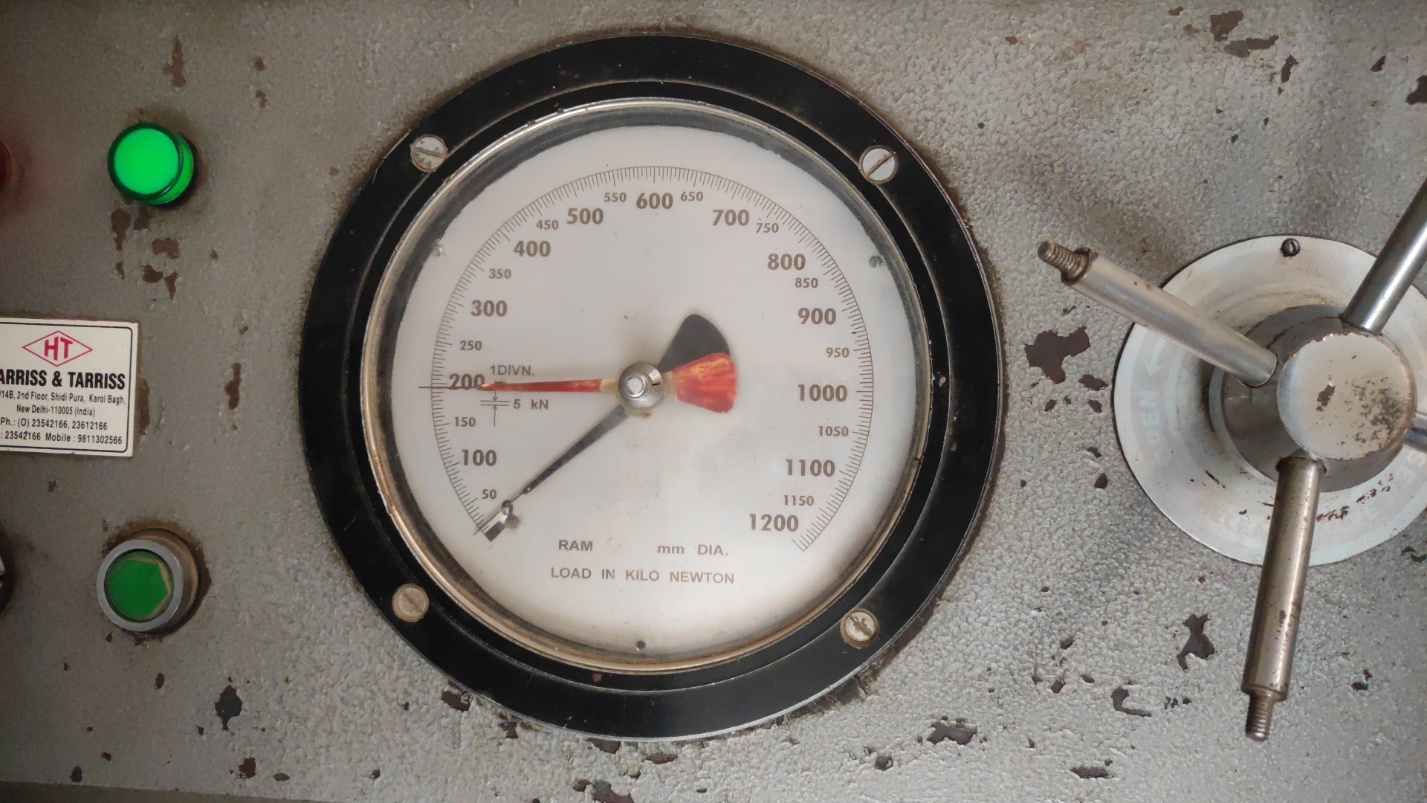


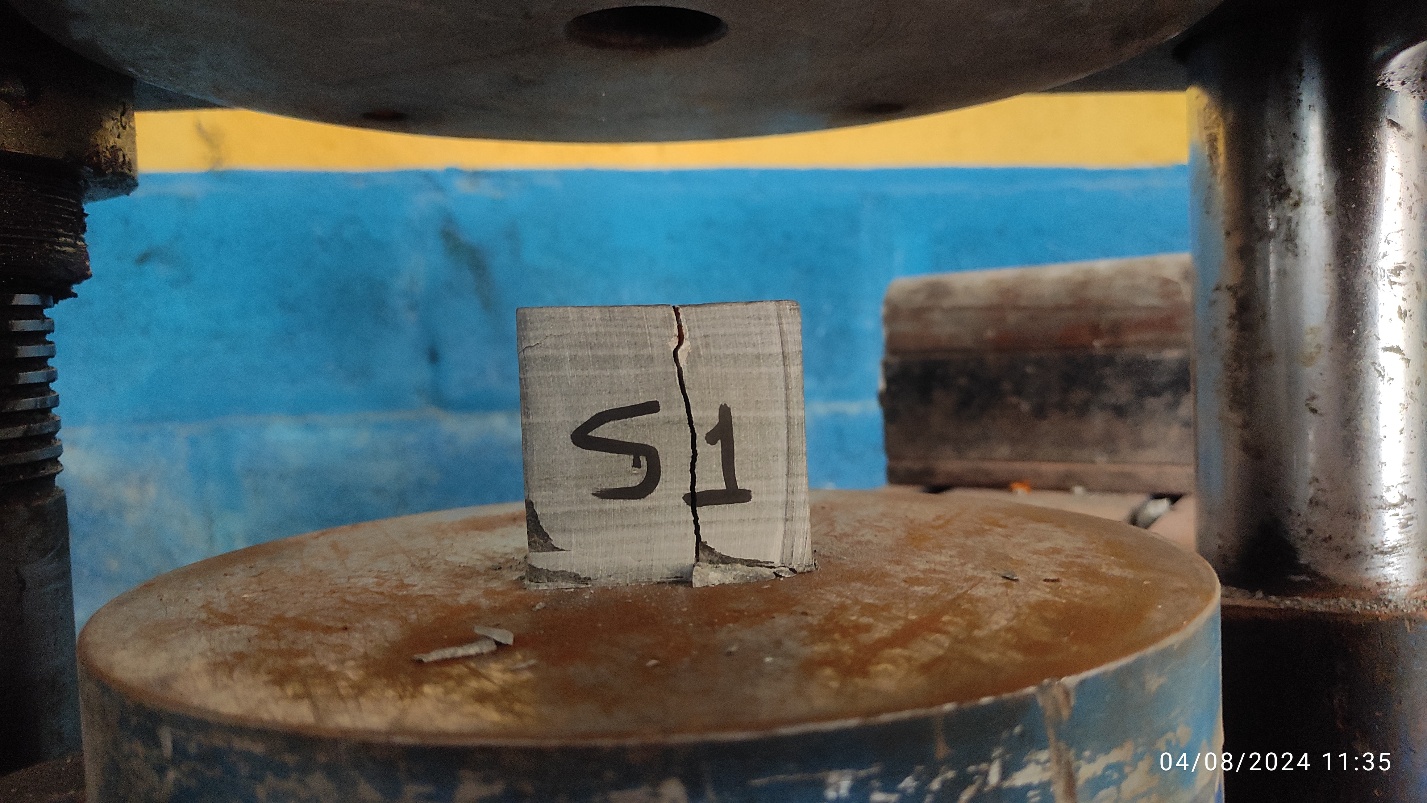


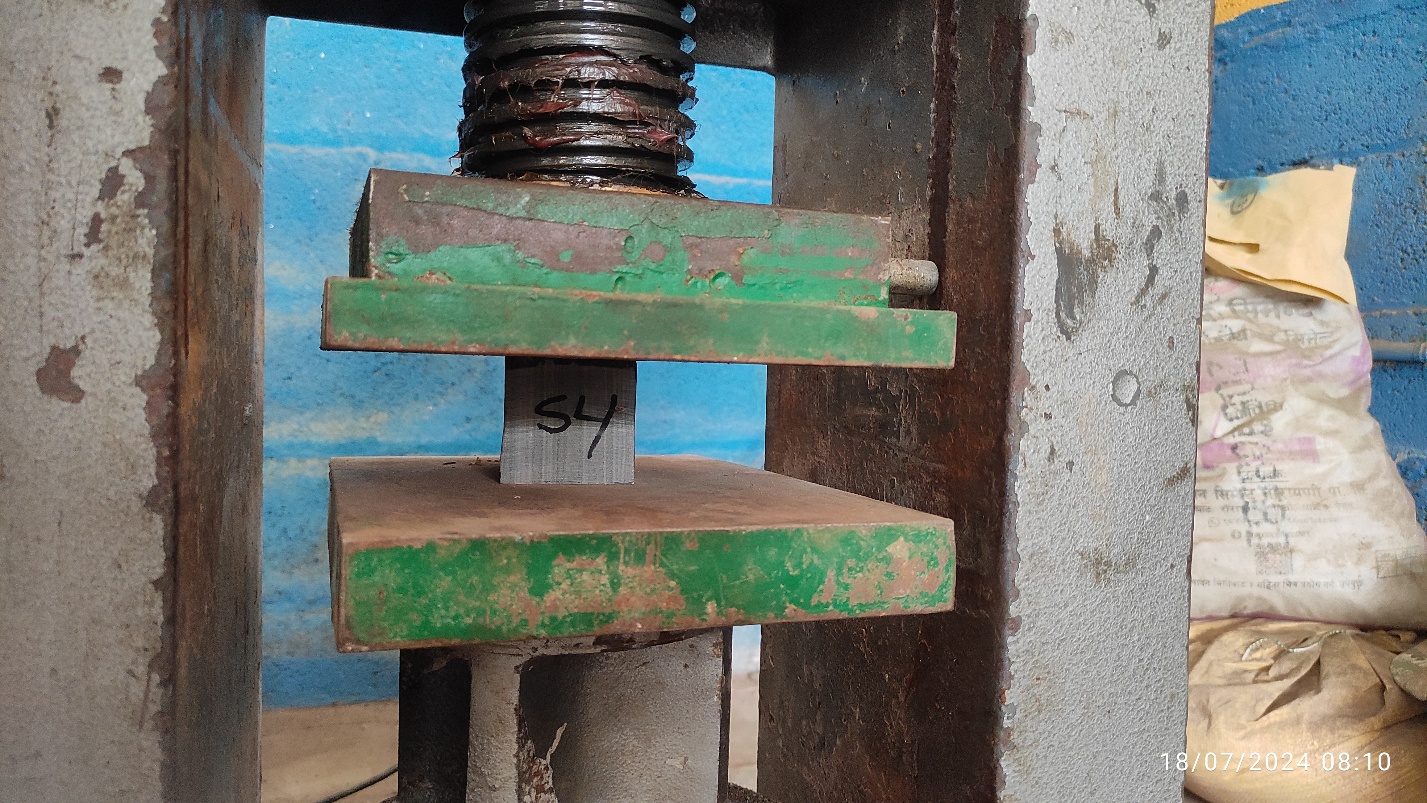


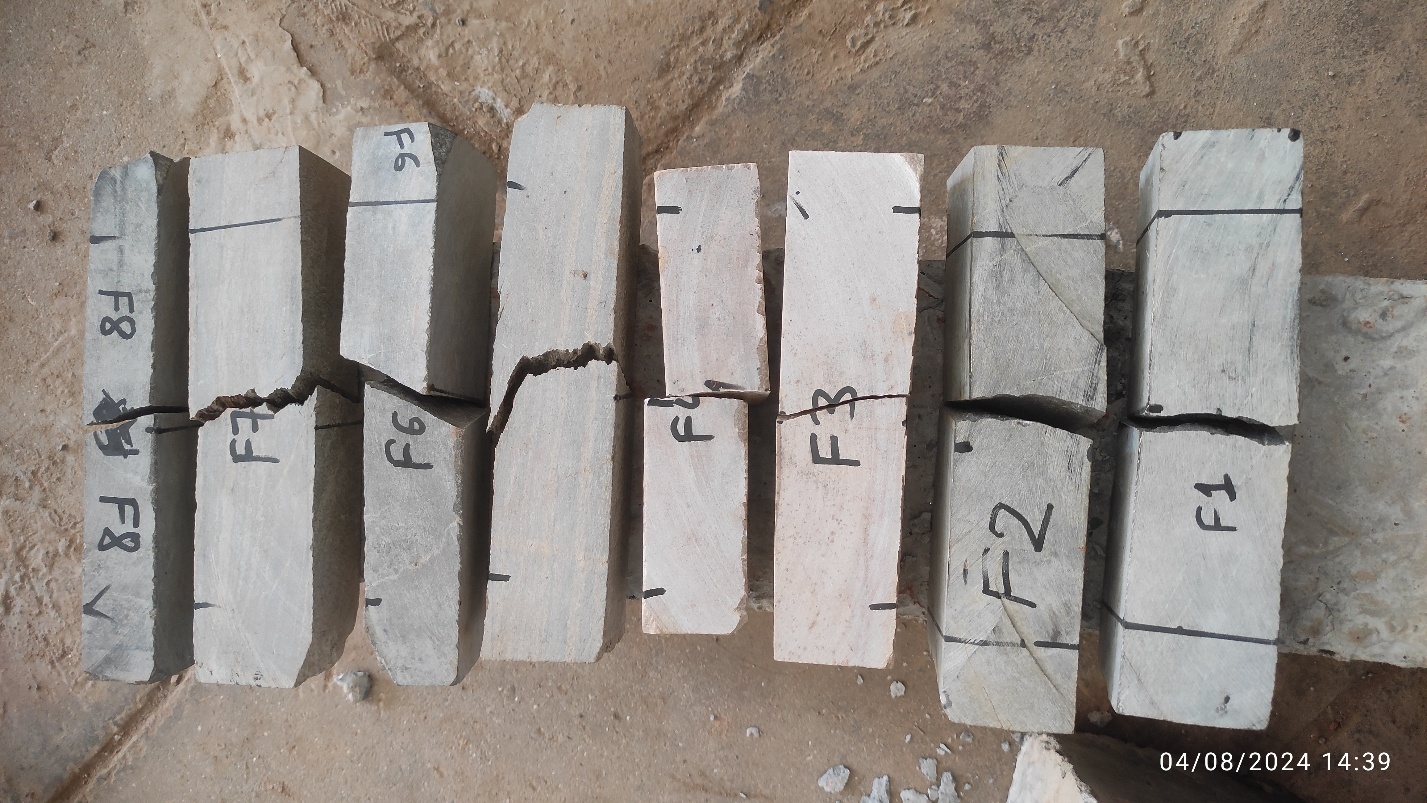


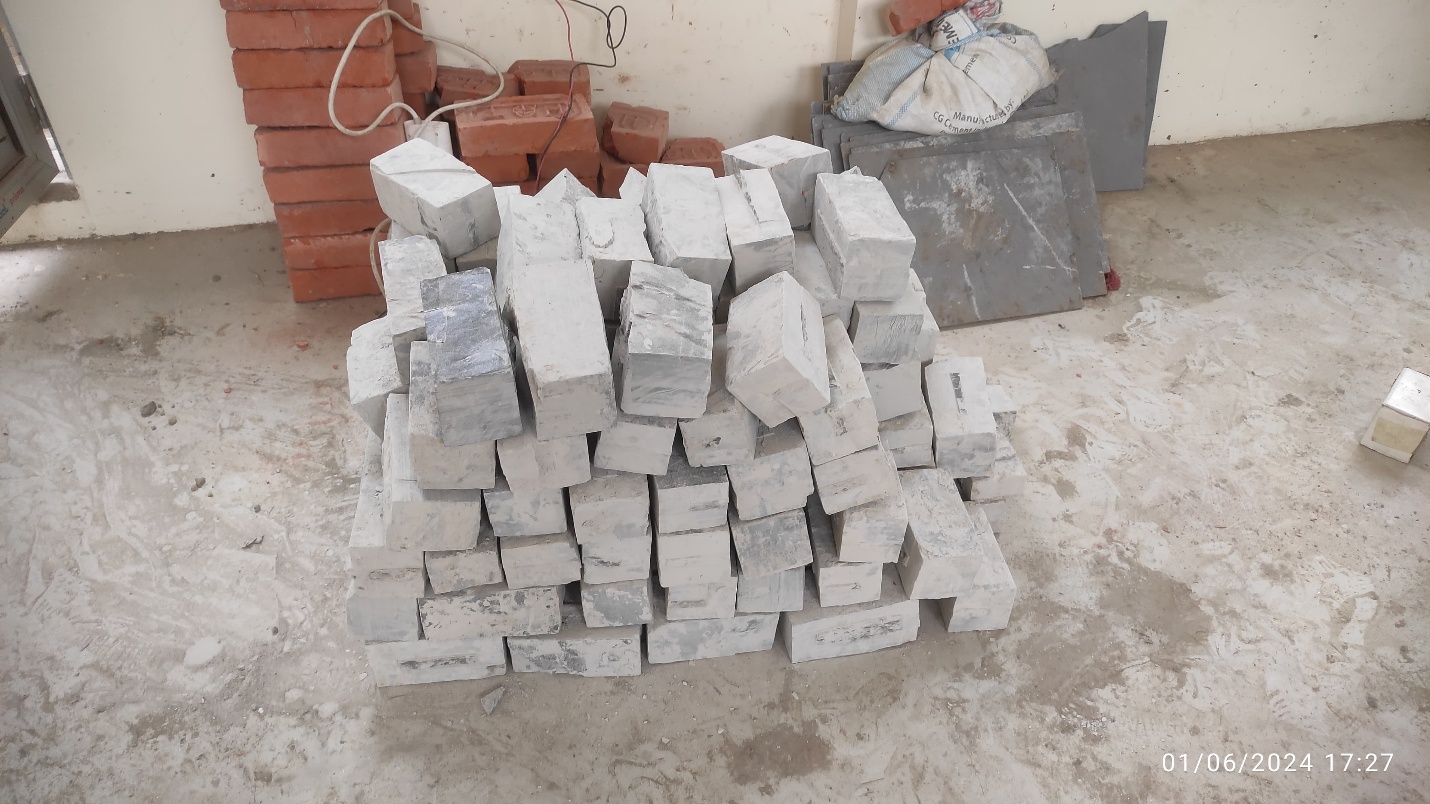


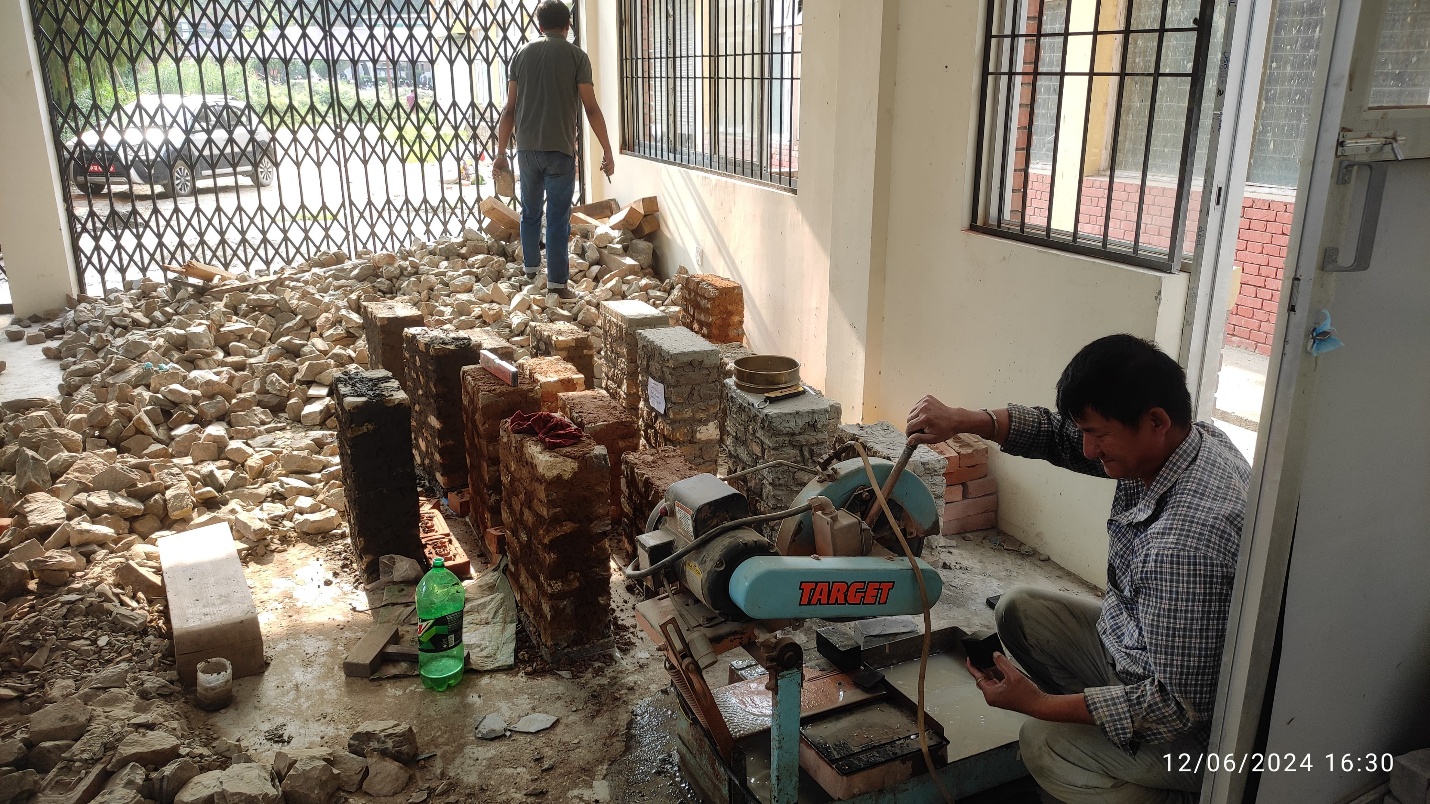


# Compressive Strength test of Mud Mortar Cube


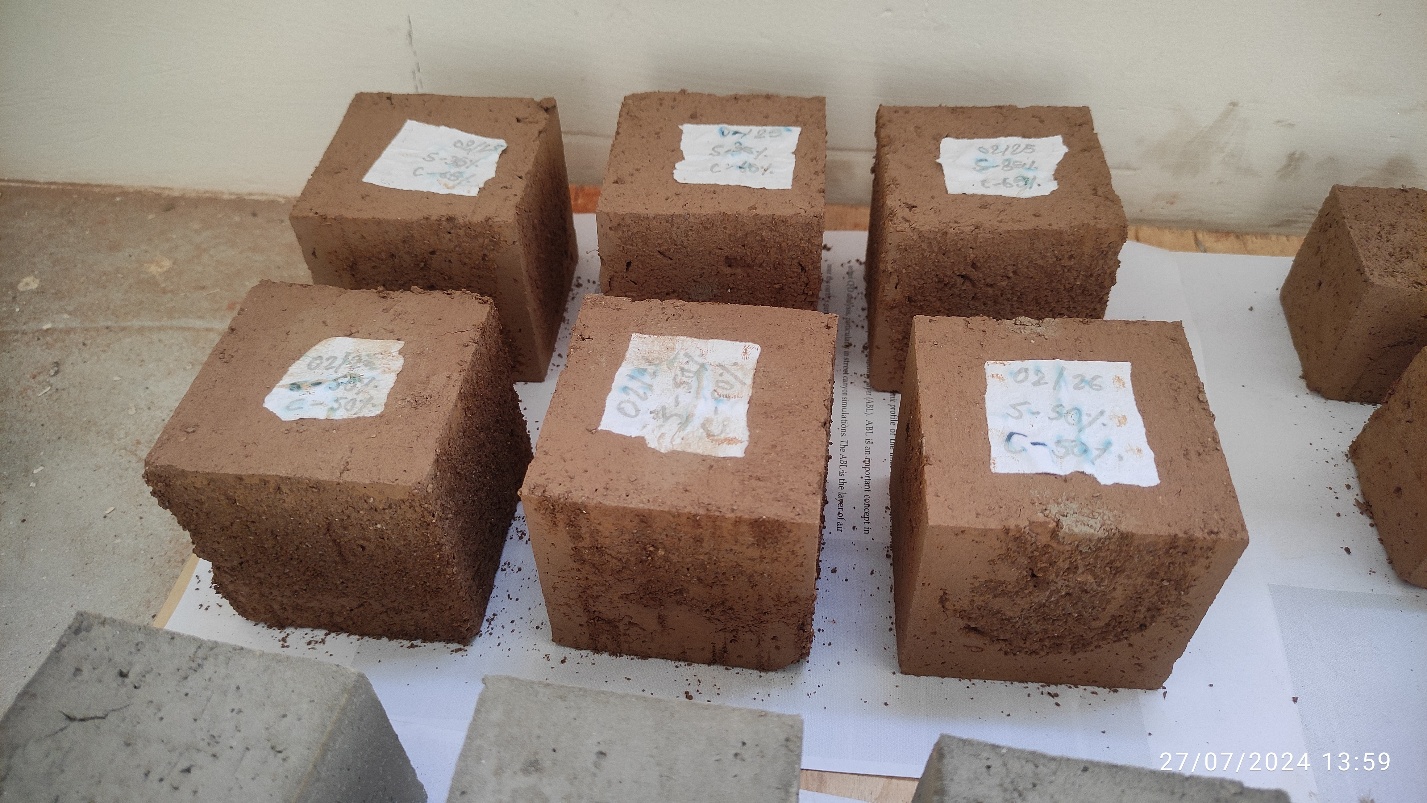


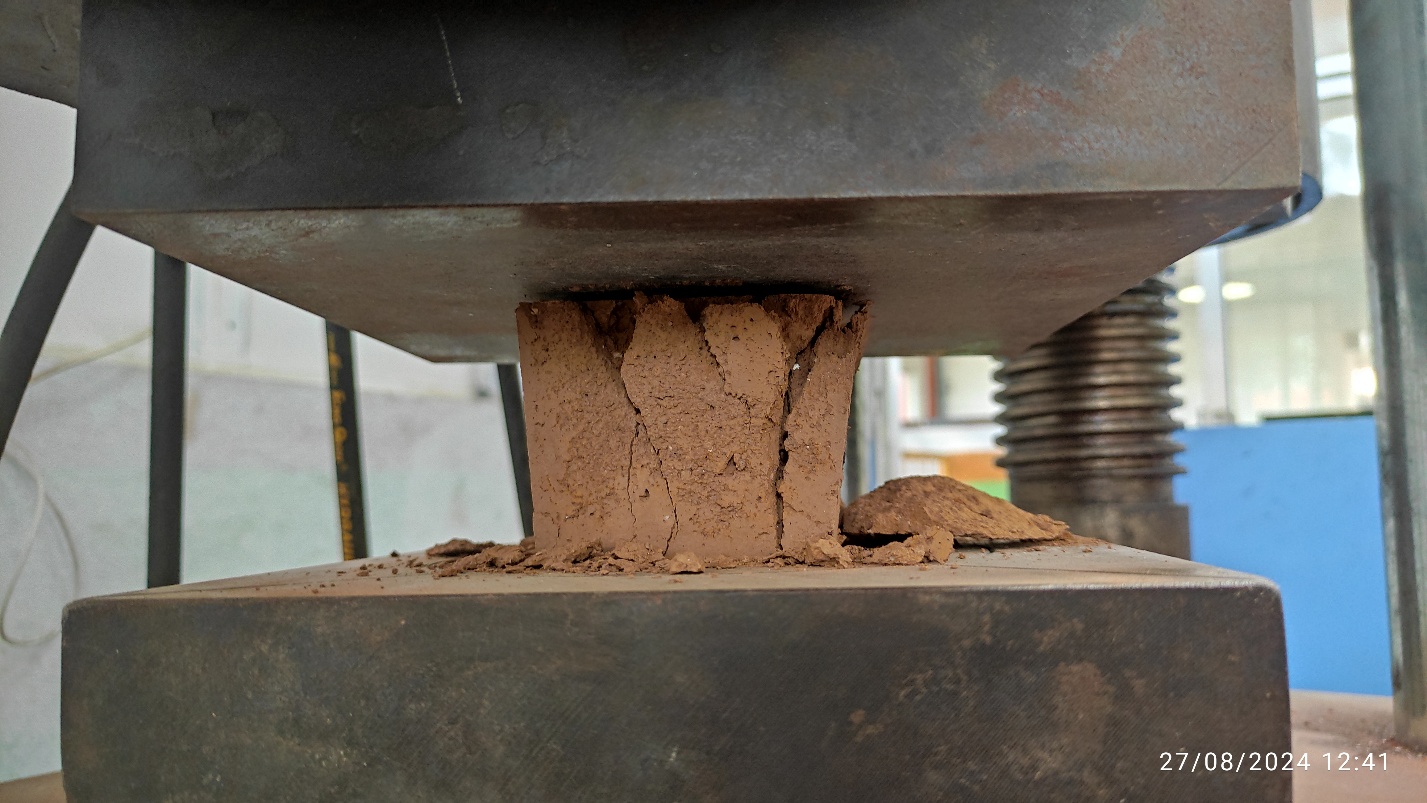

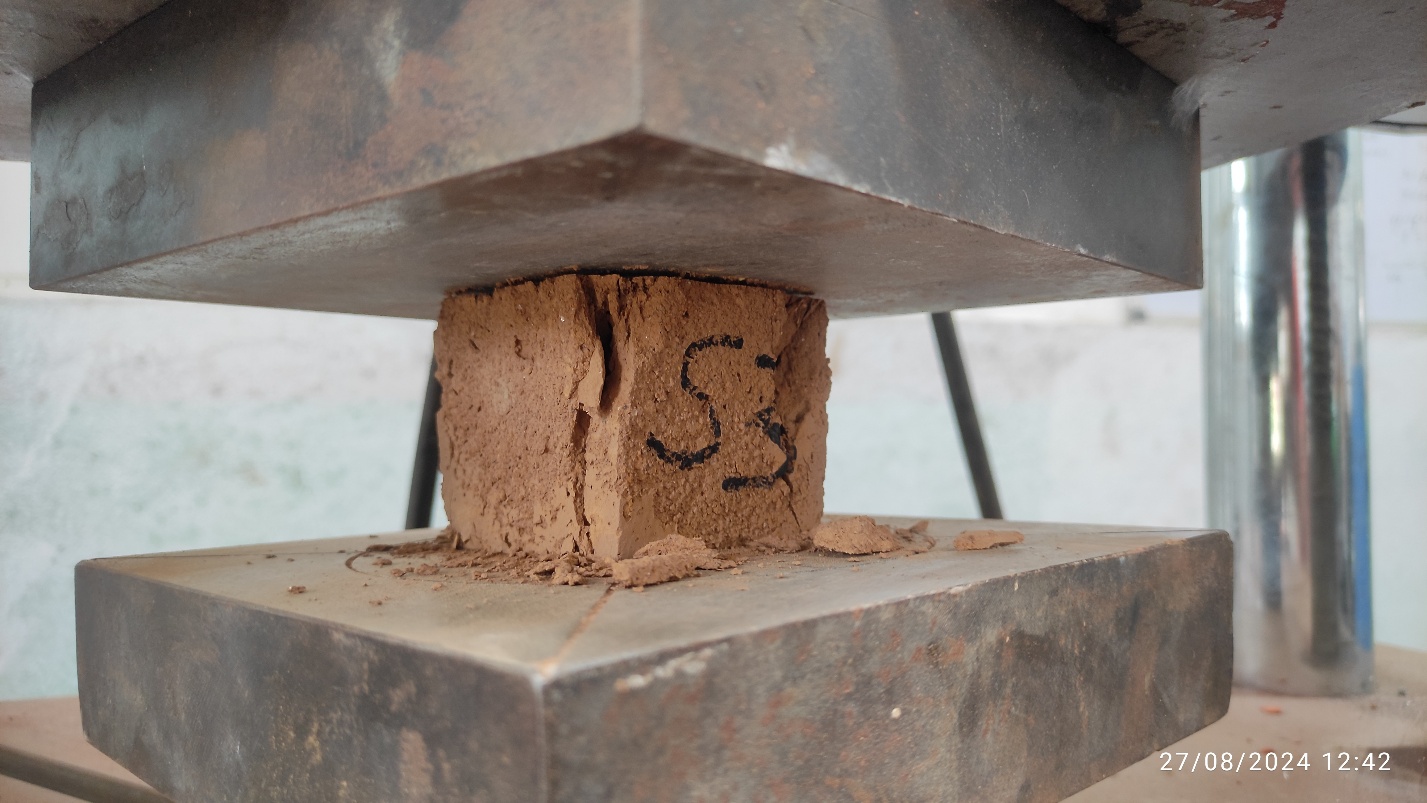


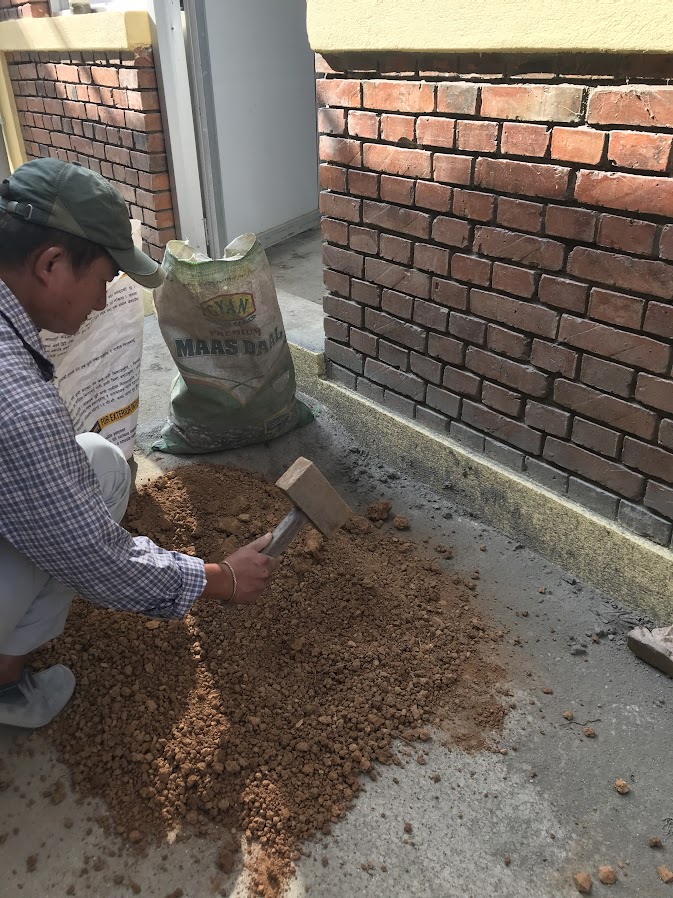


# Diagonal Shear Strength Test of Dressed Masonry Wall


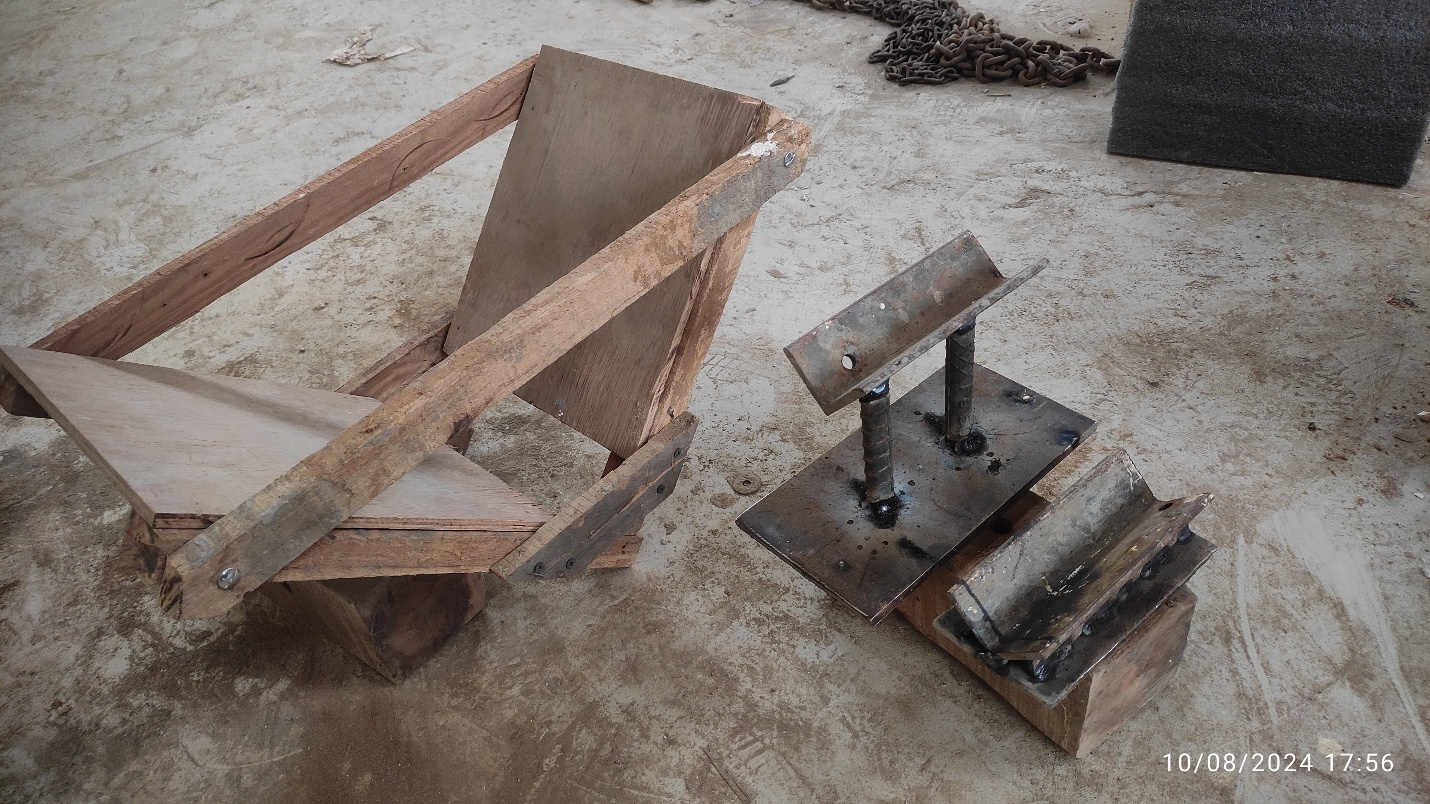


Preparation of loading mechanism


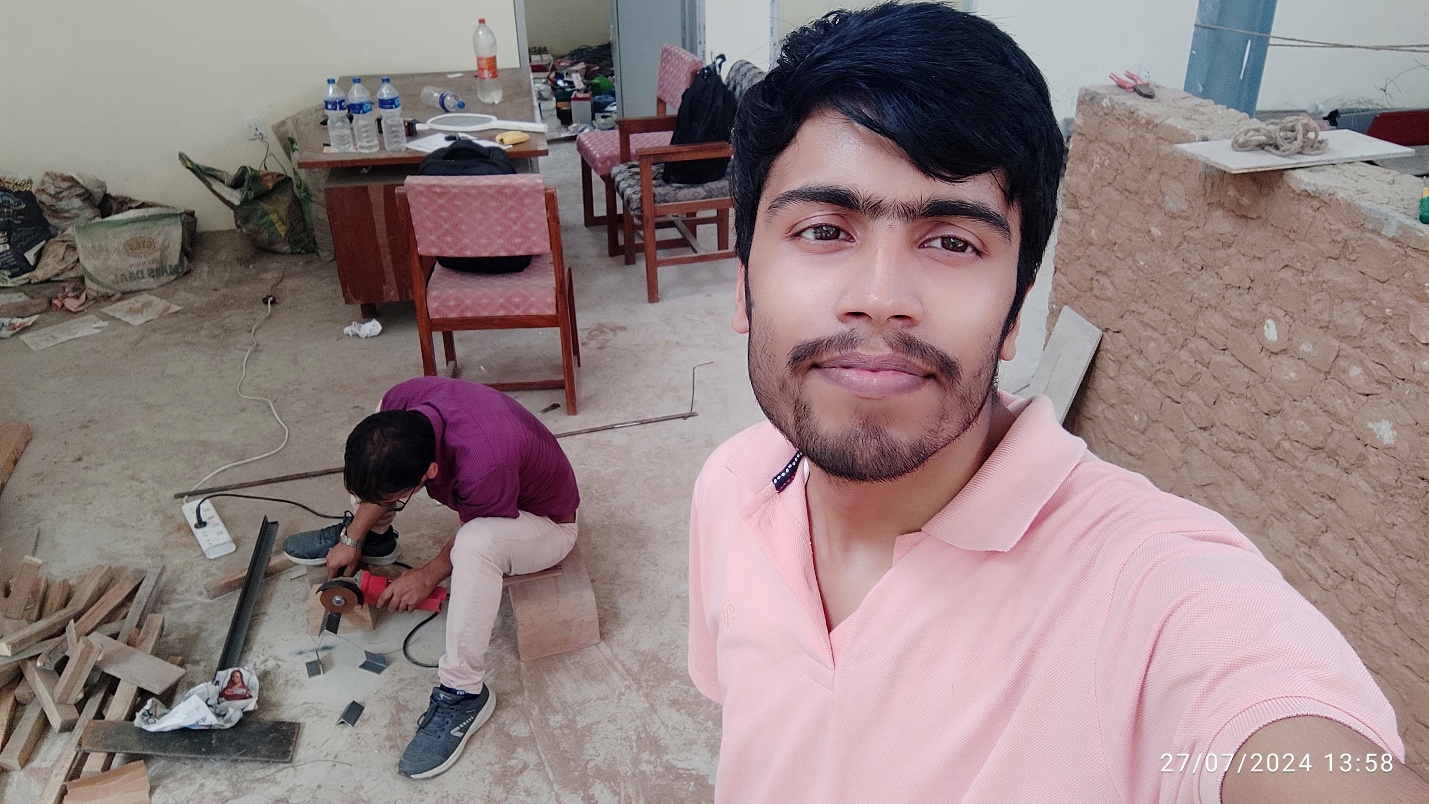


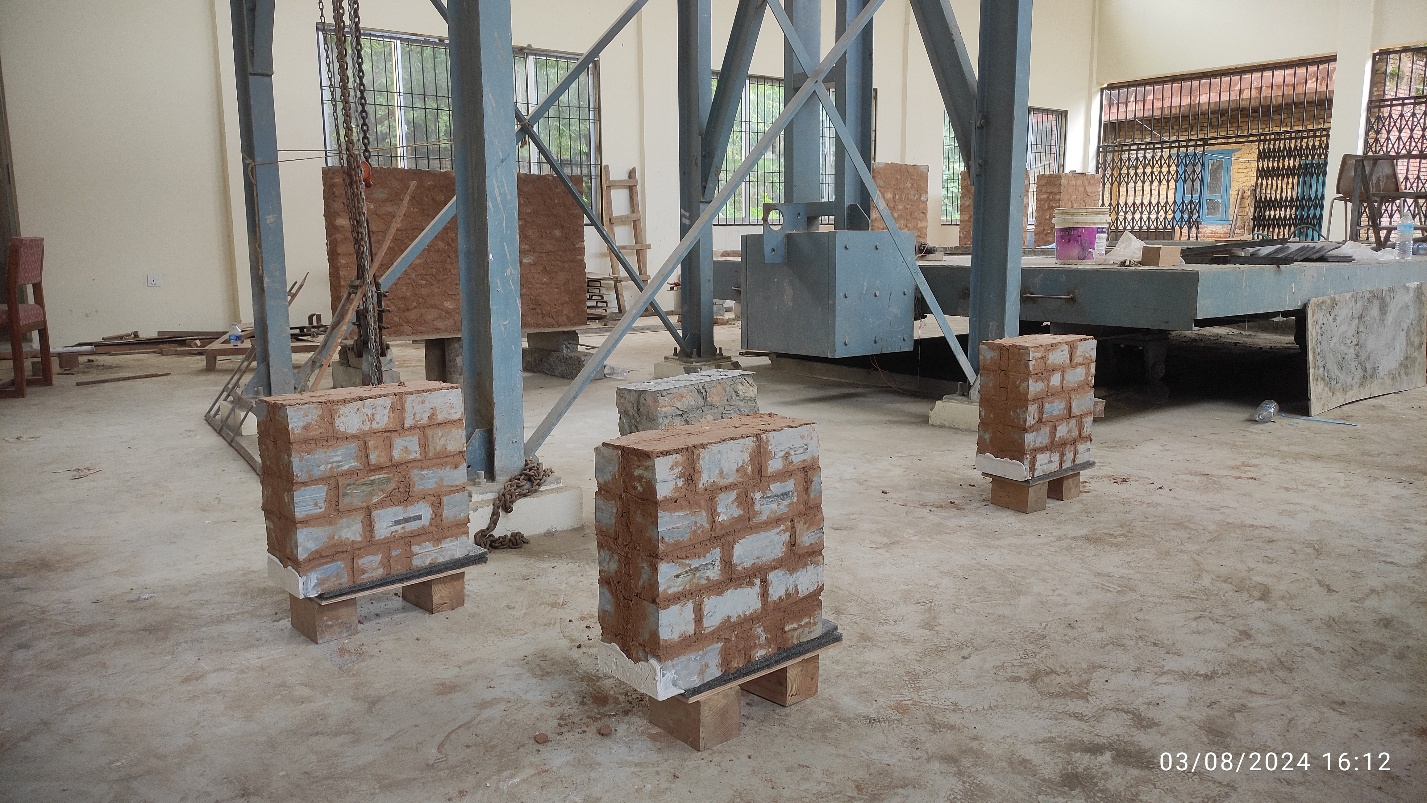


Samples in lab (applying POP in loading corners)


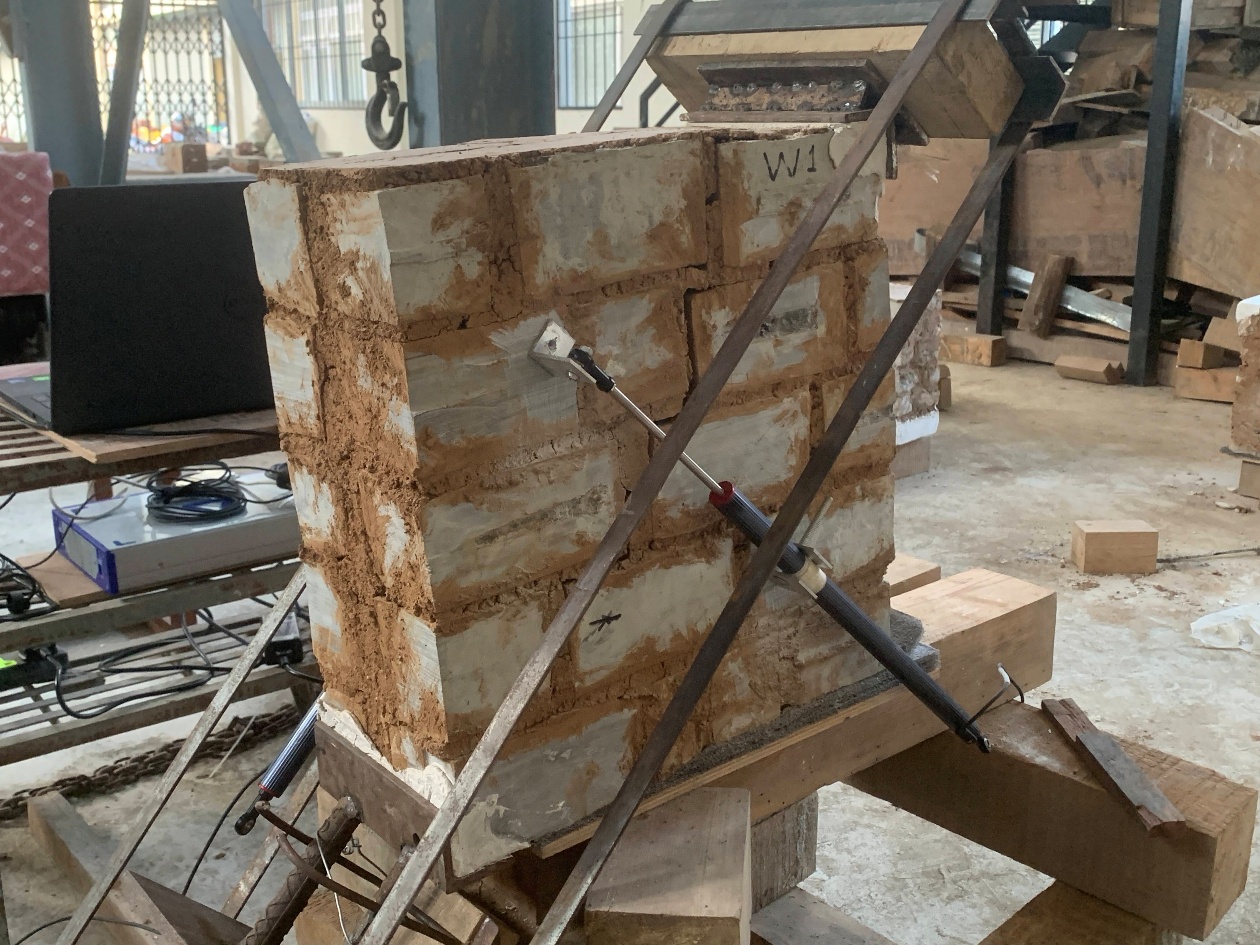


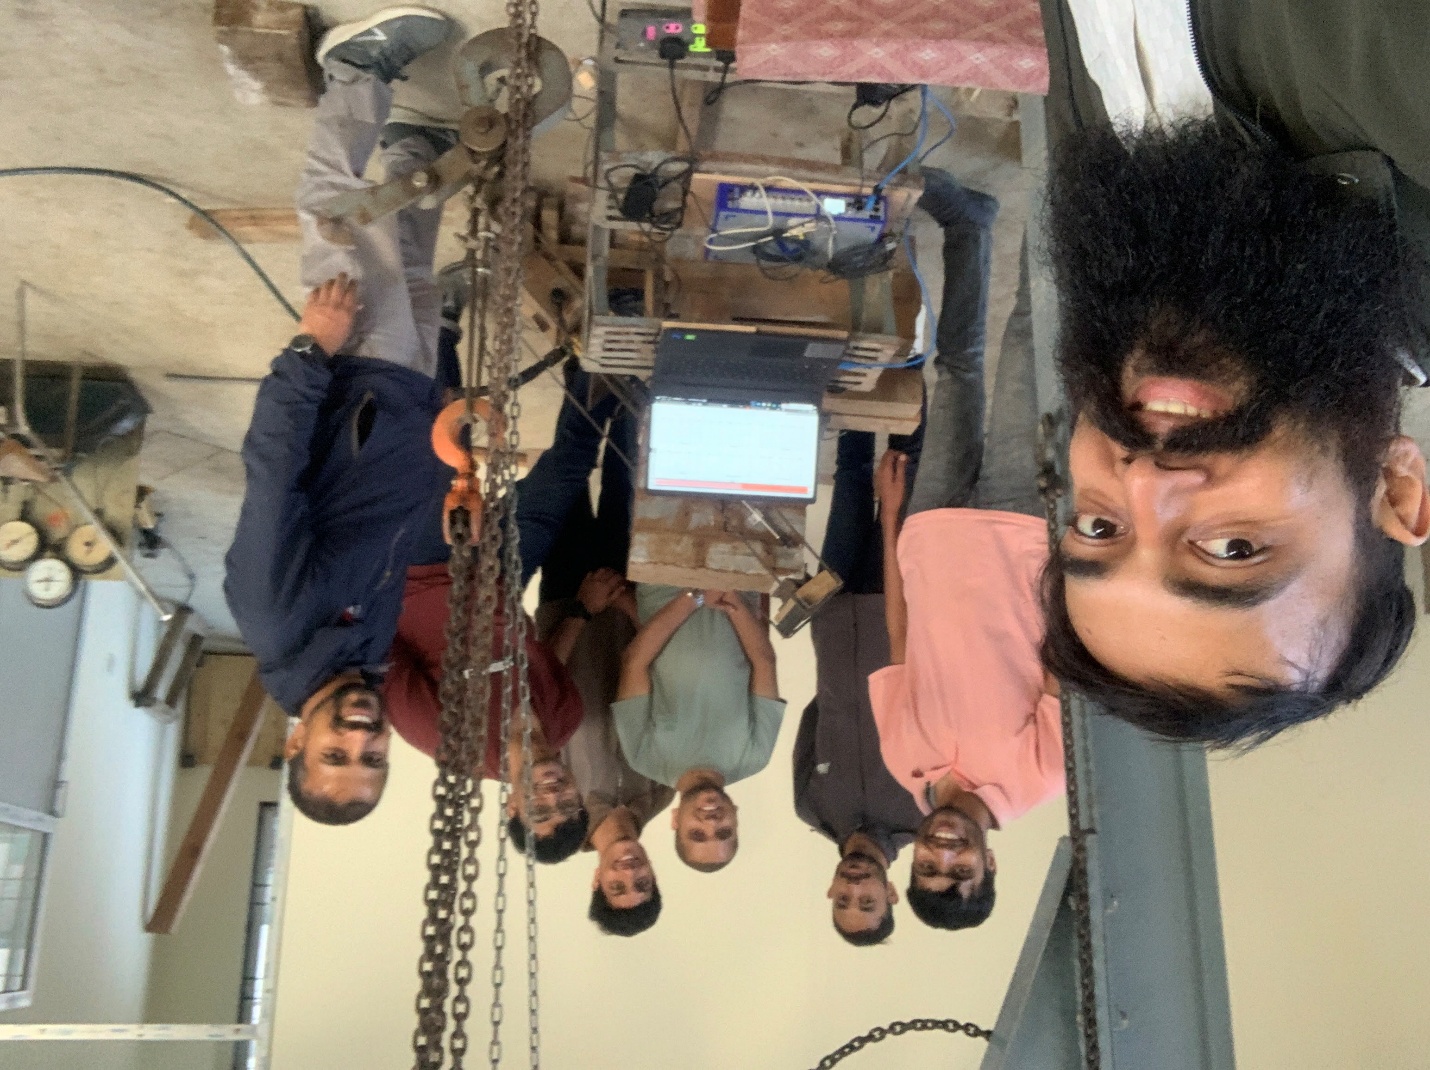


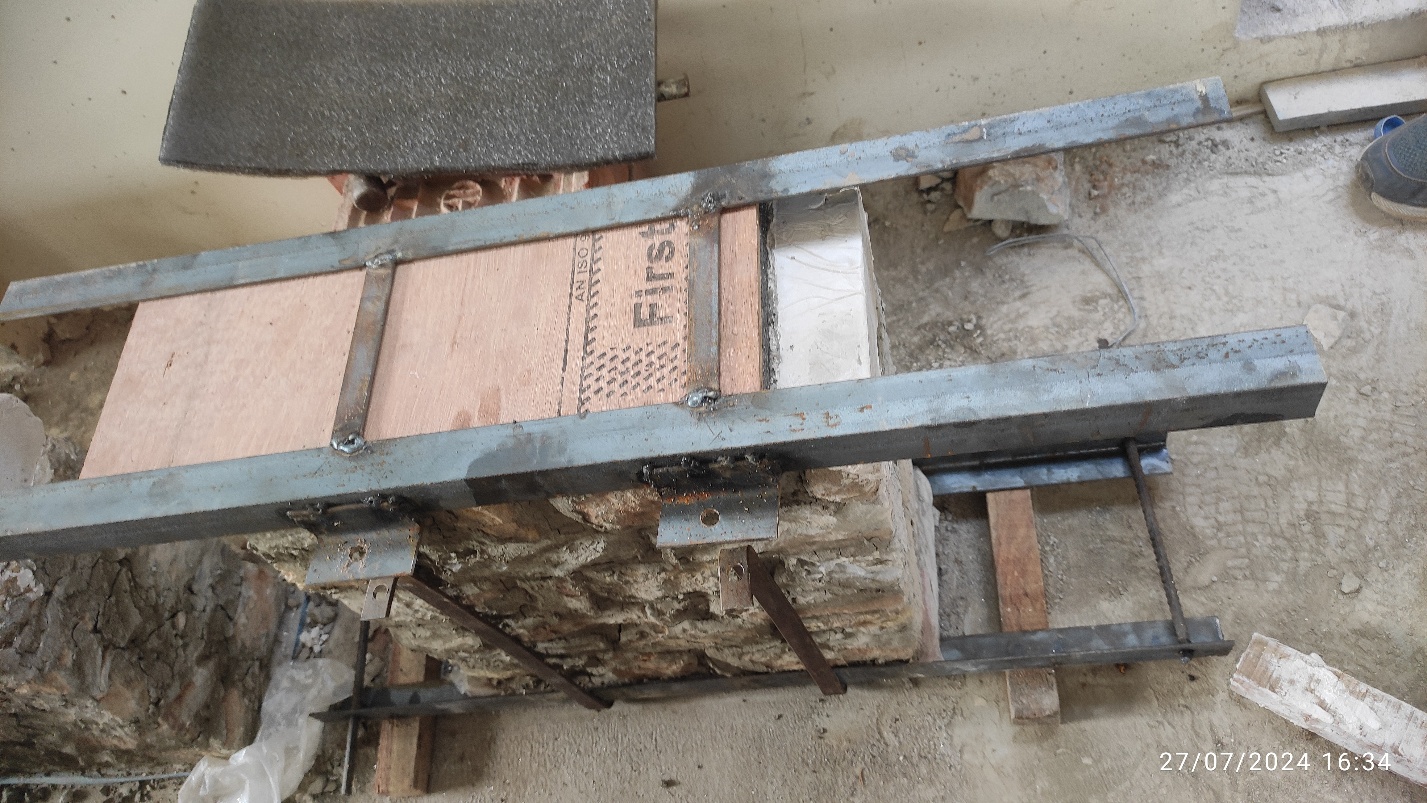


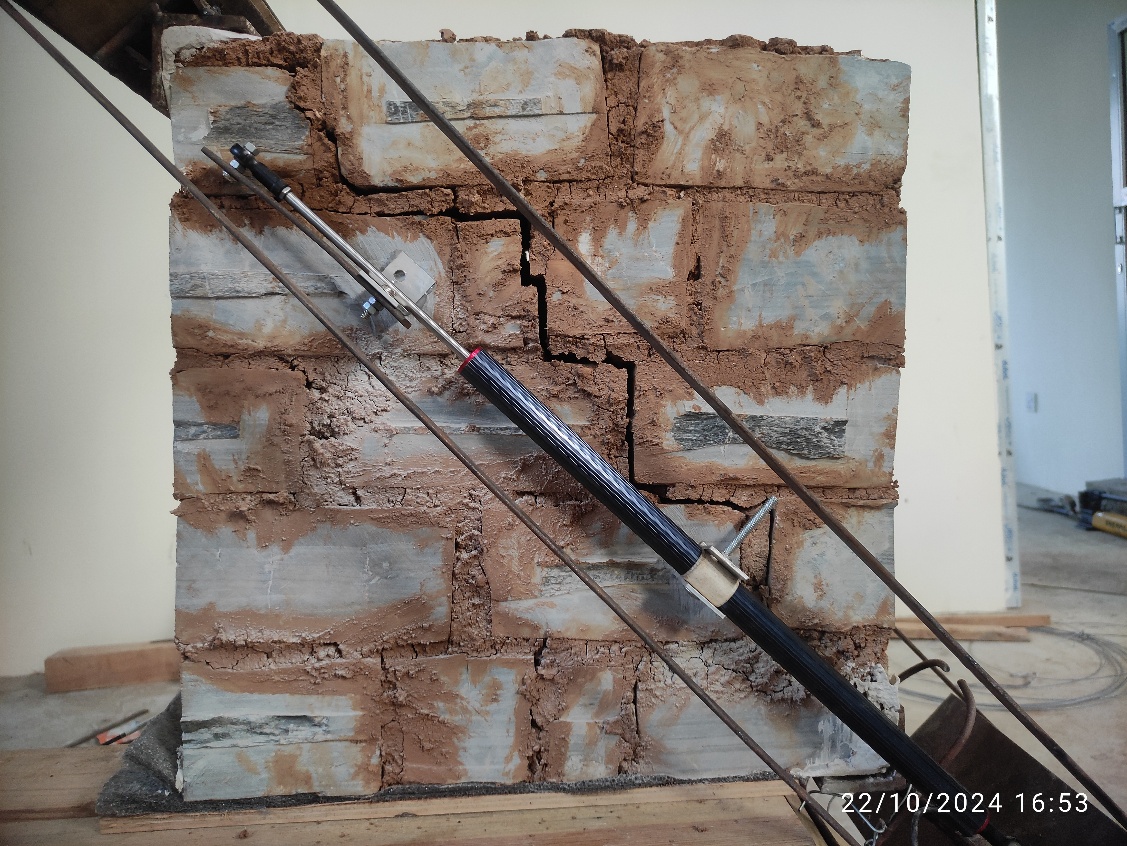

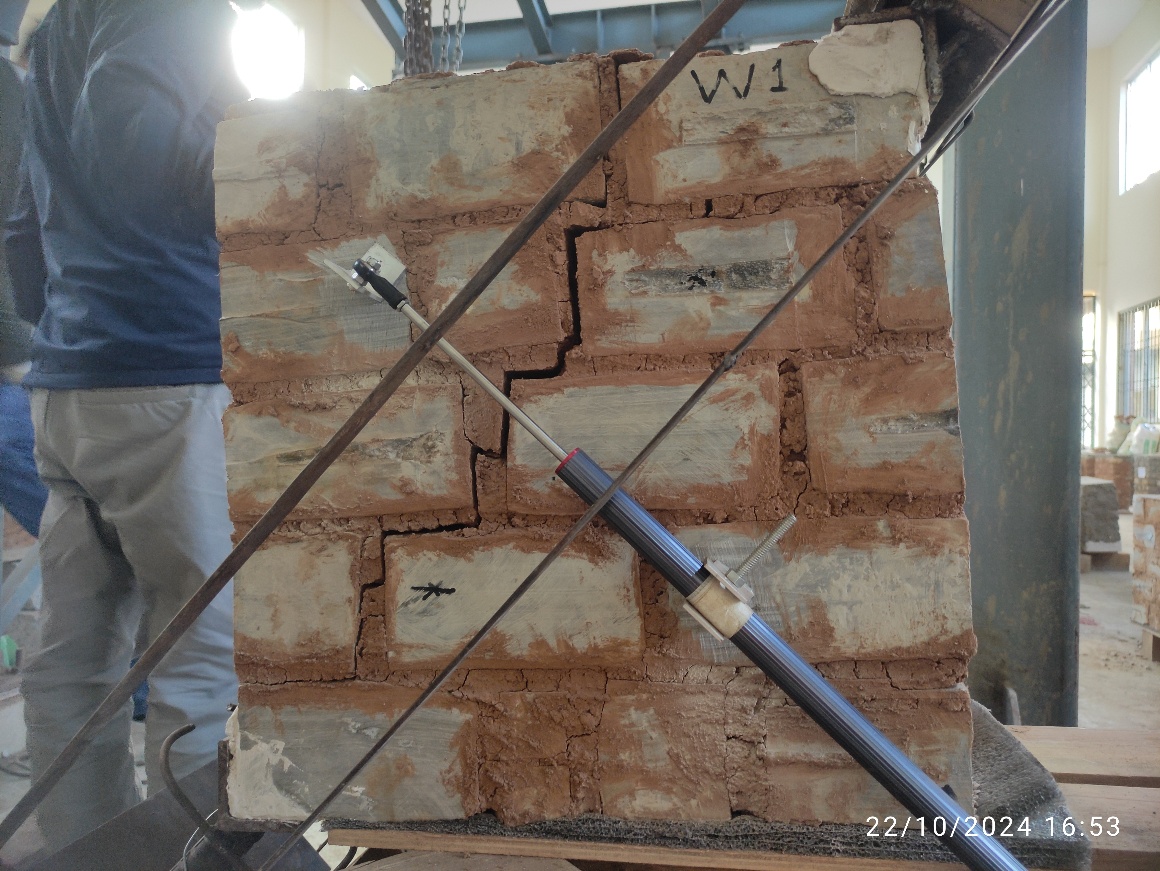


# Compressive Strength Test of Dressed Stone Masonry Wall


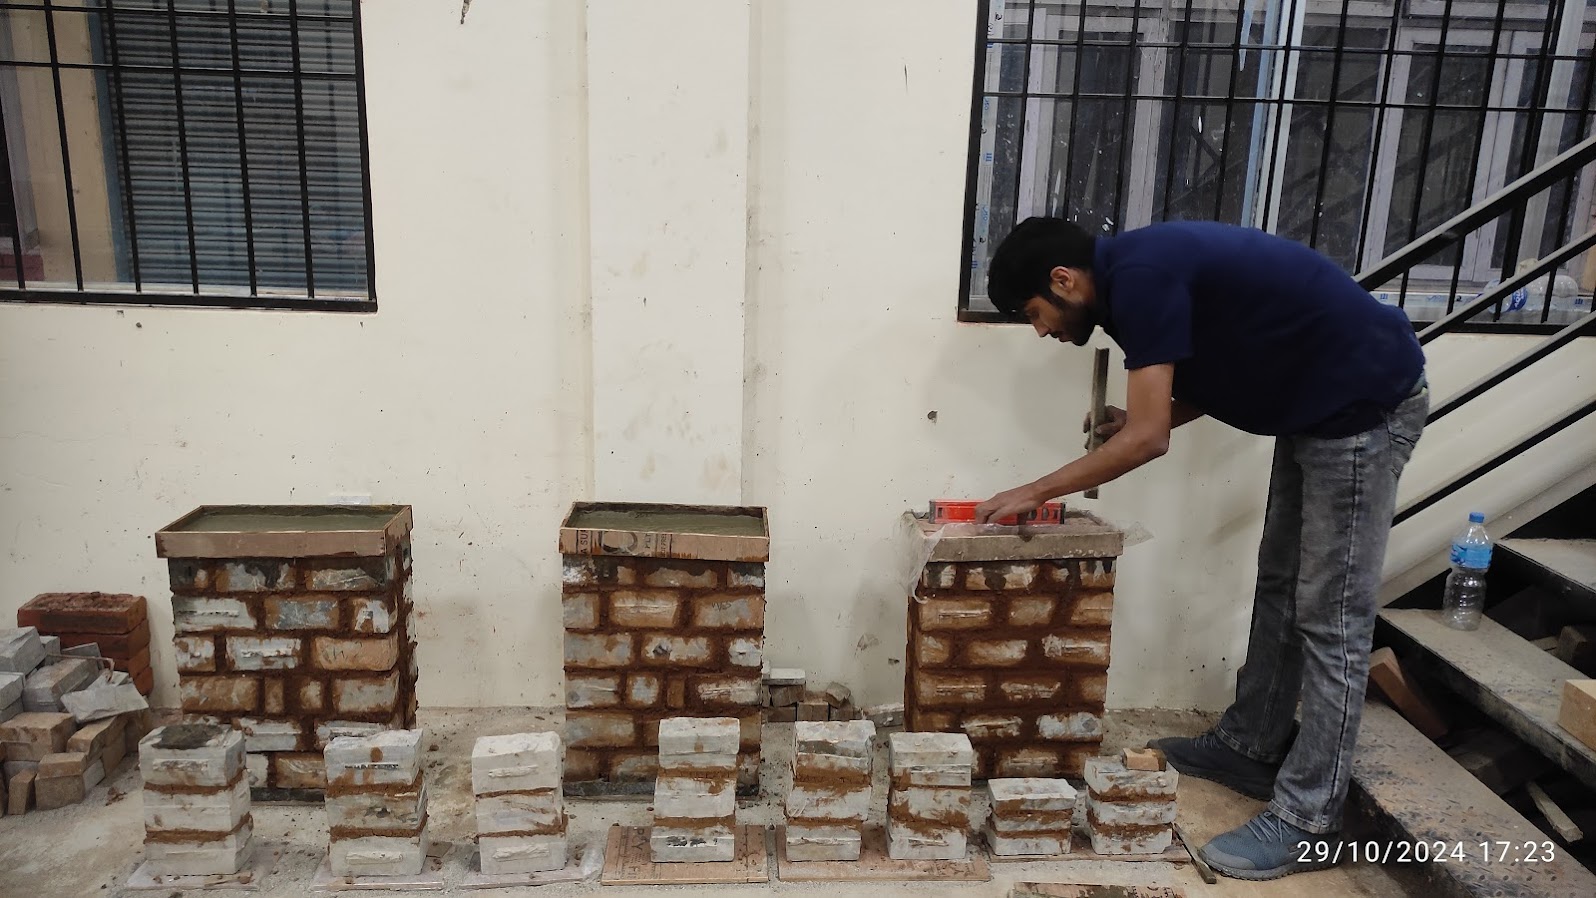


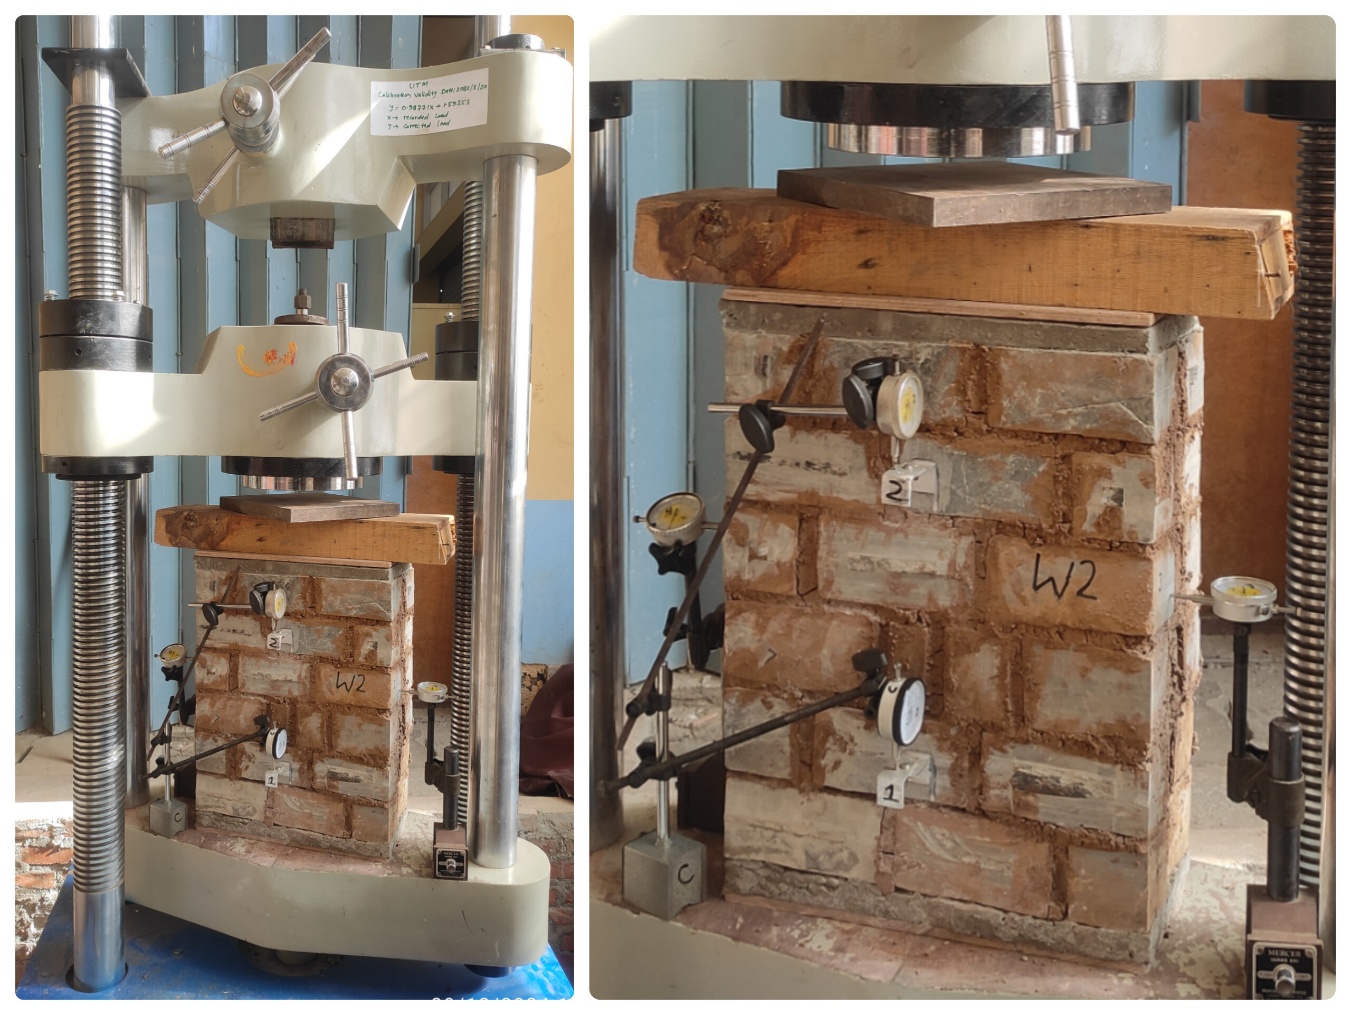


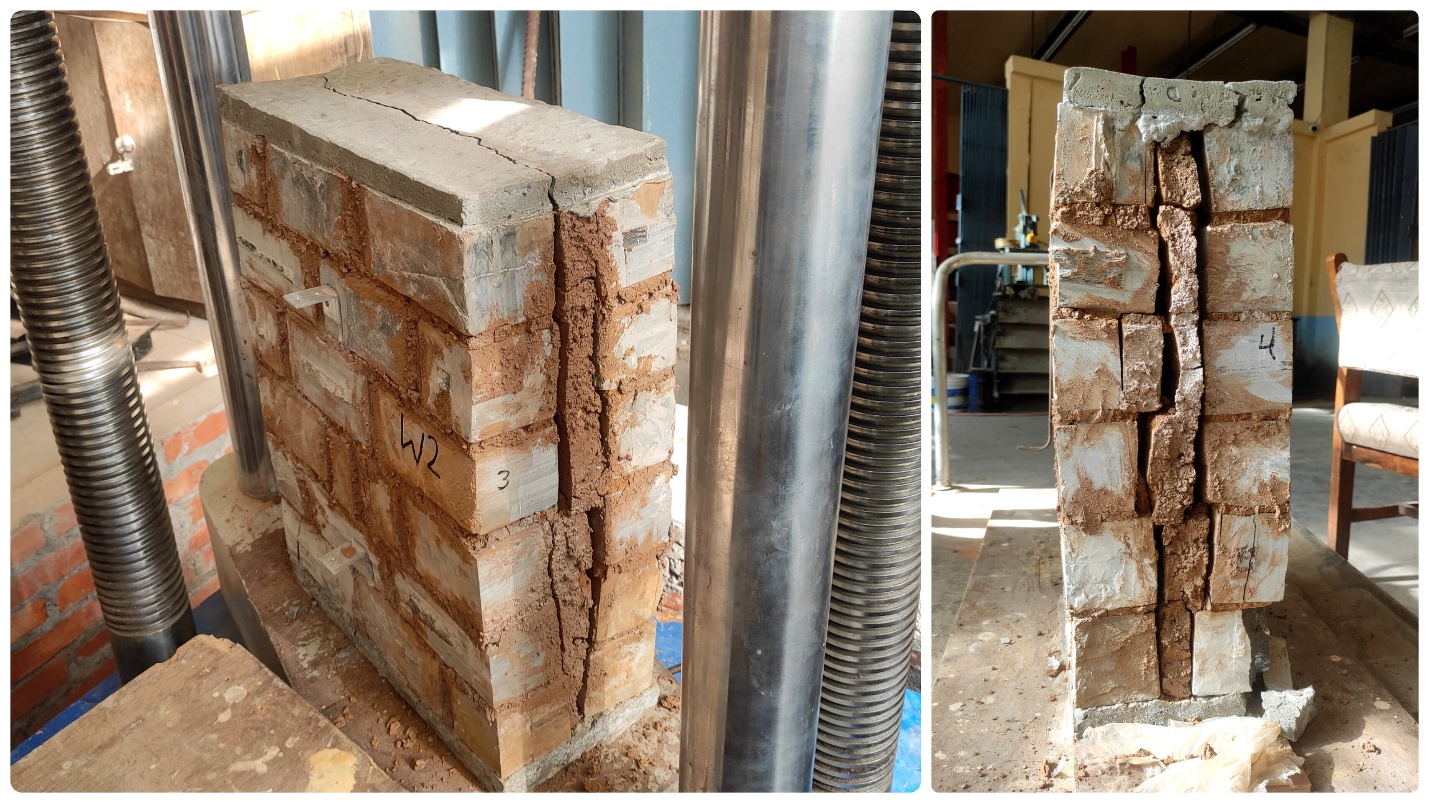


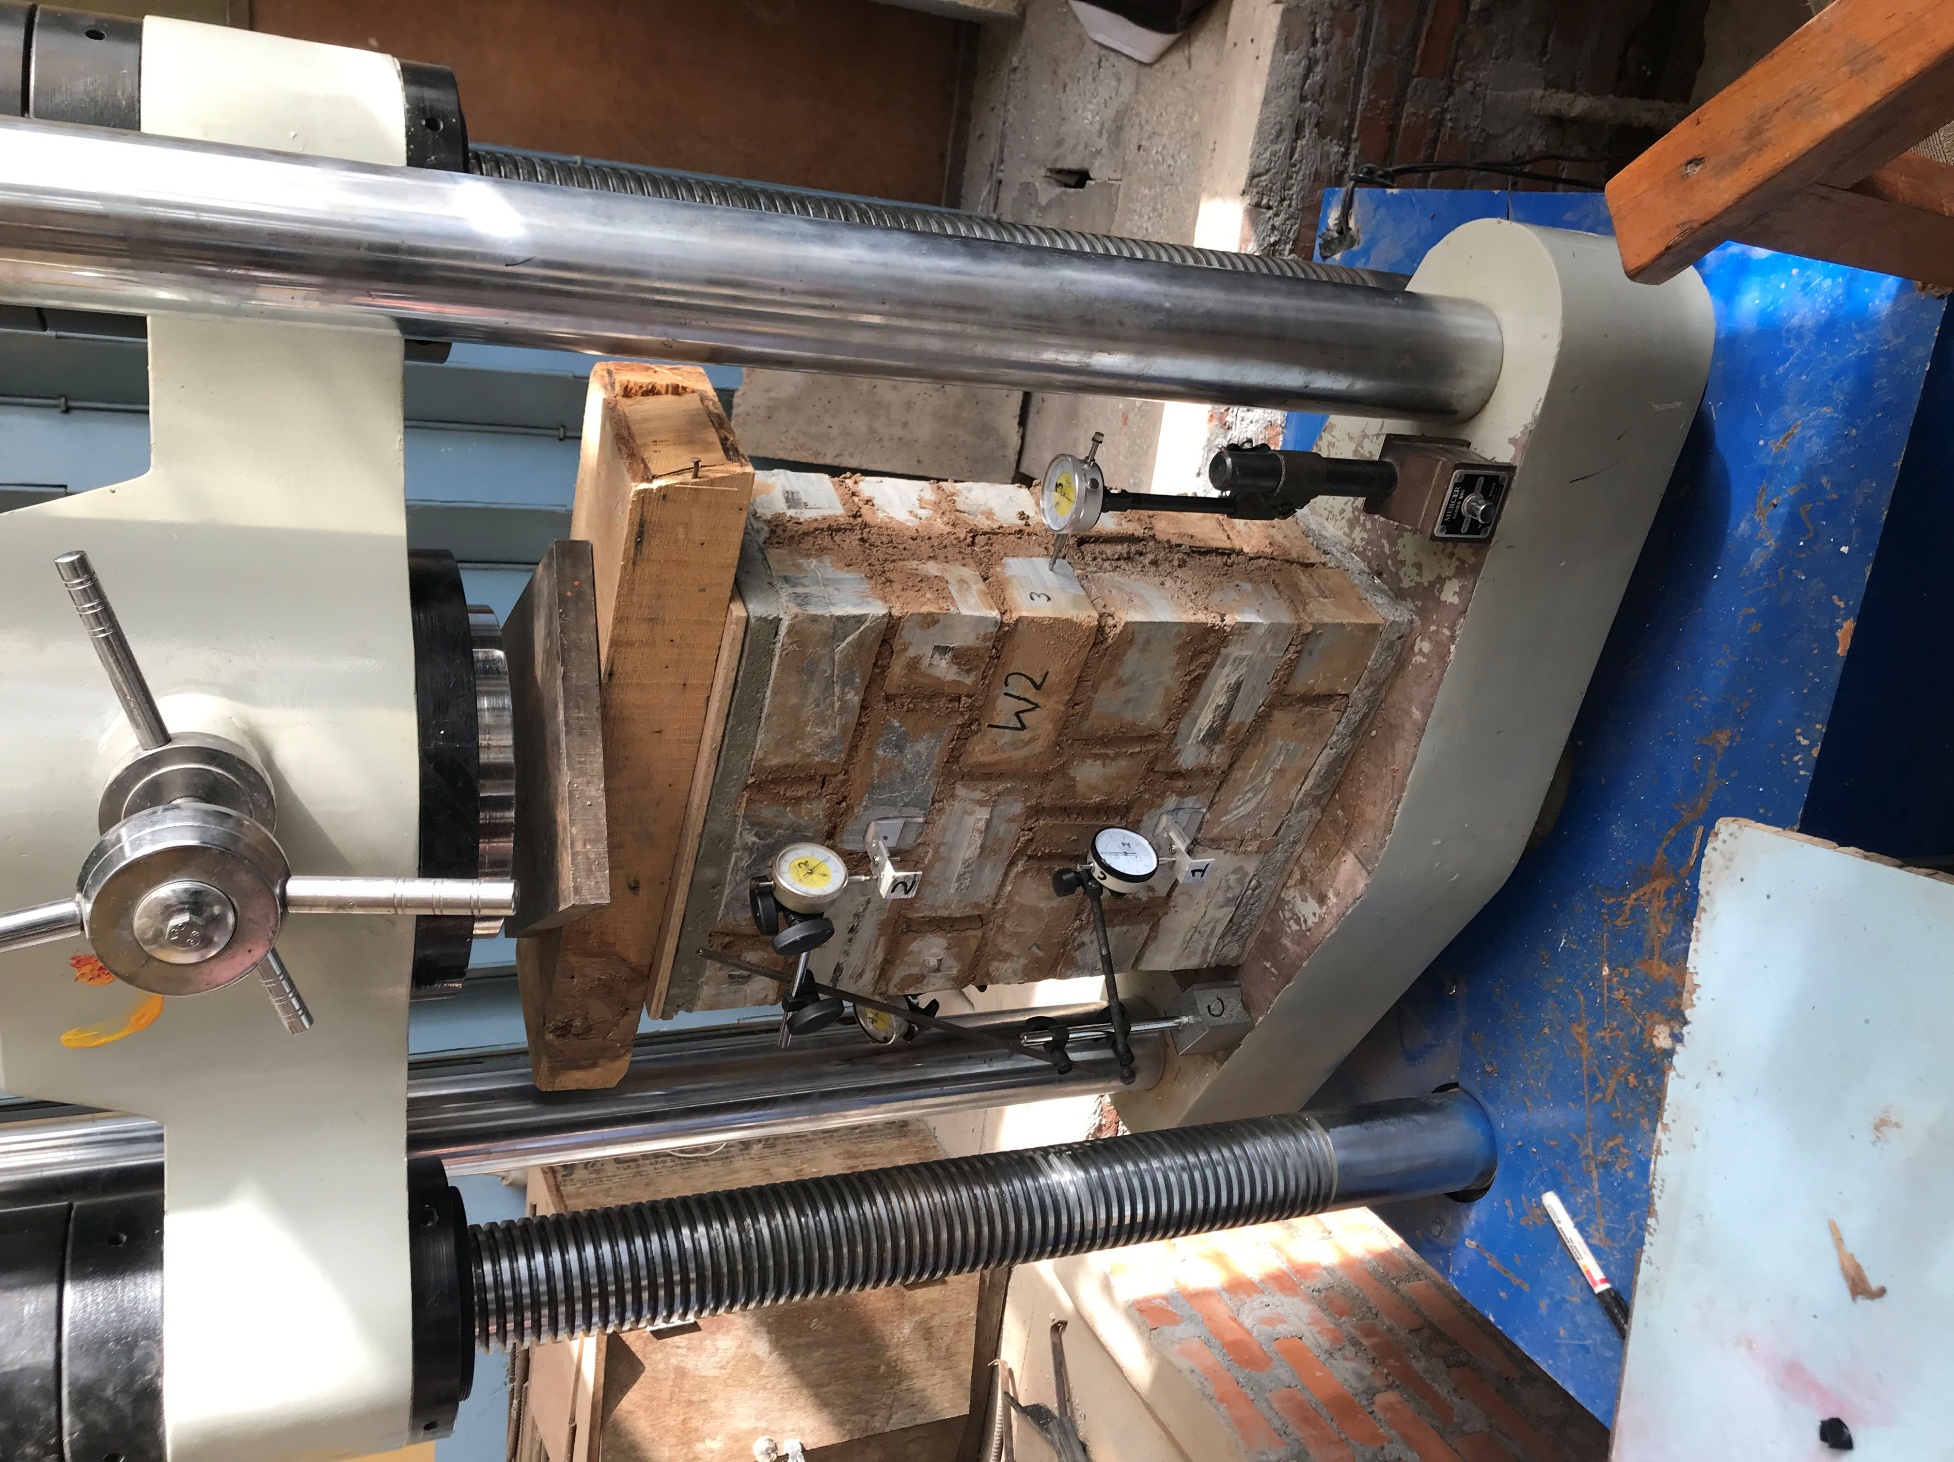


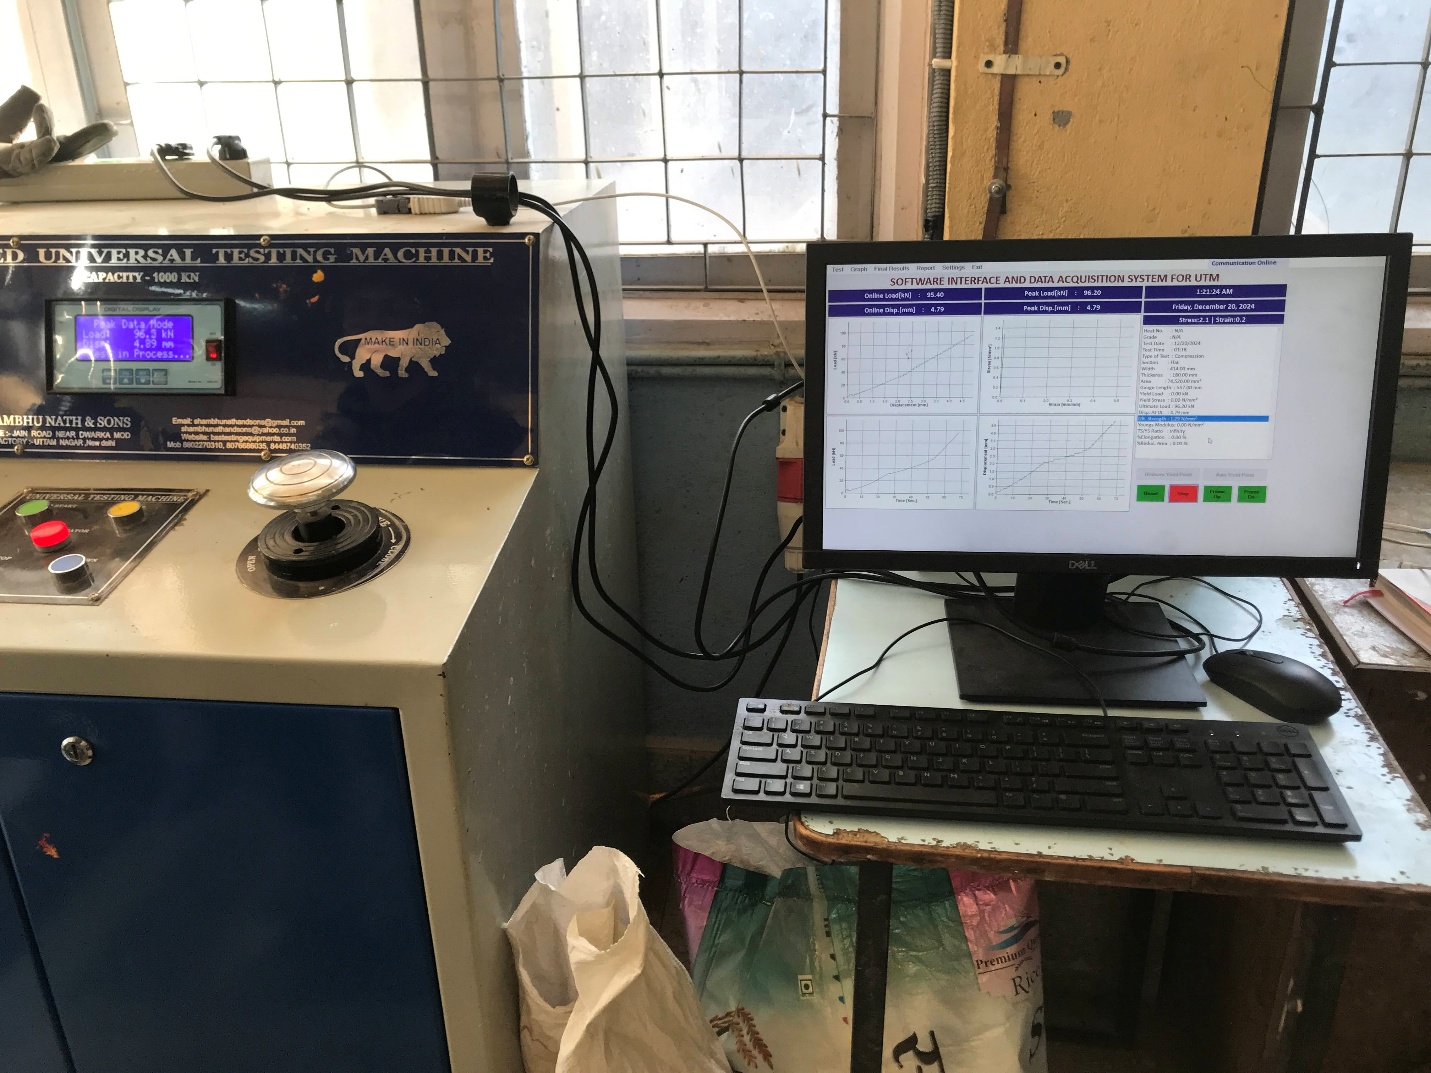

Supplement: Supplementary file 1 [file e48ad9f1d27df671ccea0320.docx]
